# Supplementary material for: Red Blood Cell Adenylate Energetics Is Related to Endothelial and Microvascular Function in Long COVID
Source: MDPI journal article supplement (doi:10.3390/biomedicines12030554), 2024-03-01
Supplement: s1 [file s1]

## Supplementary material

### Red Blood Cell Adenylate Energetics is Related to Endothelial and Microvascular Function in Long COVID

| Patient | Age (years) | Gender | COVID19 diagnosis | Blood sample collection/<br>FMSF testing | Time interval (days) | Post-COVID19 symptoms |
|---------|-------------|--------|-------------------|------------------------------------------|----------------------|-----------------------|
| 1       | 43          | F      | 22/12/2020        | 15/02/2021                               | 55                   | tachycardia, fatigue  |
| 2       | 37          | F      | 08/01/2021        | 22/02/2021                               | 45                   | dyspnea, chest pain   |
| 3       | 50          | F      | 13/12/2020        | 22/02/2021                               | 71                   | fatigue, headache     |
| 4       | 45          | F      | 01/11/2020        | 22/02/2021                               | 113                  | fatigue               |
| 5       | 48          | F      | 25/11/2020        | 22/02/2021                               | 89                   | fatigue, chest pain   |
| 6       | 43          | F      | 25/11/2020        | 01/03/2021                               | 96                   | chest pain            |
| 7       | 34          | F      | 26/10/2020        | 01/03/2021                               | 126                  | fatigue               |
| 8       | 47          | F      | 01/11/2020        | 01/03/2021                               | 120                  | fatigue               |
| 9       | 44          | F      | 07/12/2020        | 15/03/2021                               | 98                   | fatigue               |
| 10      | 25          | F      | 15/12/2020        | 15/03/2021                               | 90                   | chest pain            |
| 11      | 23          | F      | 26/11/2020        | 15/03/2021                               | 109                  | fatigue               |
| 12      | 27          | F      | 14/12/2020        | 15/03/2021                               | 91                   | tachycardia, fatigue  |
| 13      | 38          | M      | 24/02/2021        | 15/03/2021                               | 19                   | fatigue, chest pain   |
| 14      | 45          | M      | 26/11/2020        | 22/03/2021                               | 116                  | fatigue               |
| 15      | 23          | M      | 01/01/2021        | 15/02/2021                               | 45                   | tachycardia, fatigue  |
| 16      | 45          | M      | 21/10/2020        | 22/02/2021                               | 124                  | fatigue               |
| 17      | 25          | M      | 01/11/2020        | 22/02/2021                               | 113                  | fatigue               |
| 18      | 25          | M      | 08/12/2020        | 01/03/2021                               | 83                   | fatigue, dyspnea      |
| 19      | 48          | M      | 01/12/2020        | 01/03/2021                               | 90                   | fatigue, chest pain   |

Table S1. Dates of COVID19 diagnosis, peripheral blood sample collection, and FMSF testing in recruited patients. F – female, M – Male.

| Parameter           | ADP<br>[μmol/L RBC] |         | AMP<br>[μmol/L RBC] |         | TAN<br>[μmol/L RBC] |         |
|---------------------|---------------------|---------|---------------------|---------|---------------------|---------|
|                     | r                   | p value | r                   | p value | r                   | p value |
| Arginine [μmol/L]   | -0.30               | 0.22    | -0.27               | 0.26    | 0.30                | 0.21    |
| Citrulline [μmol/L] | -0.16               | 0.51    | -0.01               | 0.96    | 0.30                | 0.21    |
| SDMA [μmol/L]       | -0.09               | 0.72    | 0.03                | 0.89    | -0.38               | 0.11    |
| Arginine/ADMA       | 0.06                | 0.81    | -0.11               | 0.65    | 0.42                | 0.08    |
| Glycine [μmol/L]    | 0.05                | 0.81    | 0.13                | 0.60    | 0.49                | <0.05   |
| IR index [%]        | -0.46               | <0.05   | -0.34               | 0.15    | 0.36                | 0.14    |
| IR max [%]          | -0.59               | <0.01   | -0.47               | <0.05   | 0.21                | 0.40    |
| HR index [%]        | 0.25                | 0.31    | 0.22                | 0.37    | 0.03                | 0.91    |
| HR max [%]          | 0.20                | 0.41    | 0.10                | 0.68    | -0.18               | 0.45    |
| RHR [%]             | -0.49               | 0.03    | -0.42               | 0.07    | 0.11                | 0.66    |
| Log (HS)            | -0.05               | 0.85    | 0.13                | 0.60    | -0.04               | 0.88    |

Table S2. Correlations of red blood cell adenosine diphosphate (ADP), adenosine monophosphate (AMP), and total adenine nucleotide (TAN) concentration with L-arginine/ADMA (asymmetric dimethyl-L-arginine) ratio, symmetric dimethyl L-arginine (SDMA) concentration in long COVID19 participants. Results are shown as Pearson correlation coefficient (r) and p value (p).

| Parameter                        | RBC ATP/ADP |         | RBC ADP/AMP |         | RBC AEC |         |
|----------------------------------|-------------|---------|-------------|---------|---------|---------|
|                                  | r           | p value | r           | p value | r       | p value |
| Arginine [ $\mu\text{mol/L}$ ]   | 0.42        | 0.08    | -0.09       | 0.71    | 0.40    | 0.09    |
| Citrulline [ $\mu\text{mol/L}$ ] | 0.37        | 0.13    | -0.52       | <0.05   | 0.25    | 0.30    |
| SDMA [ $\mu\text{mol/L}$ ]       | -0.03       | 0.89    | -0.42       | 0.07    | -0.10   | 0.67    |
| Arginine/ADMA                    | 0.05        | 0.83    | 0.49        | <0.05   | 0.17    | 0.49    |
| Glycine [ $\mu\text{mol/L}$ ]    | 0.20        | 0.41    | -0.28       | 0.25    | 0.14    | 0.58    |
| IR index [%]                     | 0.65        | <0.01   | -0.33       | 0.17    | 0.56    | <0.05   |
| IR max [%]                       | 0.68        | <0.01   | -0.30       | 0.21    | 0.64    | <0.05   |
| HR index [%]                     | -0.26       | 0.26    | 0.14        | 0.56    | -0.20   | 0.41    |
| HR max [%]                       | -0.34       | 0.15    | 0.35        | 0.14    | -0.23   | 0.35    |
| RHR [%]                          | 0.51        | <0.01   | -0.11       | 0.65    | 0.52    | <0.05   |
| Log (HS)                         | 0.05        | 0.85    | -0.48       | <0.05   | 0.01    | 0.99    |

Table S3. Correlations of red blood cell adenine nucleotide ratios and adenylate energy charge (AEC) with peripheral blood cell count in long COVID19 participants. Results are shown as Pearson correlation coefficient (r) and p value (p).

| Parameter     | RBC ATP/ADP |         | RBC ADP/AMP |         | RBC AEC |         |
|---------------|-------------|---------|-------------|---------|---------|---------|
|               | r           | p value | r           | p value | r       | p value |
| RBC [T/L]     | -0.21       | 0.41    | 0.08        | 0.75    | -0.29   | 0.25    |
| Hct [%]       | -0.25       | 0.33    | 0.26        | 0.30    | -0.29   | 0.25    |
| Hgb [g/dL]    | -0.23       | 0.37    | 0.18        | 0.48    | -0.24   | 0.34    |
| MCV [fL]      | -0.06       | 0.70    | 0.29        | 0.24    | 0.04    | 0.88    |
| MCH [pg]      | -0.04       | 0.88    | 0.16        | 0.55    | 0.09    | 0.74    |
| MCHC [g/dL]   | 0.02        | 0.92    | -0.16       | 0.54    | 0.07    | 0.77    |
| RDW [%]       | 0.04        | 0.86    | -0.03       | 0.89    | 0.03    | 0.92    |
| WBC [G/L]     | 0.21        | 0.40    | 0.12        | 0.63    | 0.18    | 0.48    |
| NEU [G/L]     | 0.21        | 0.40    | 0.19        | 0.45    | 0.16    | 0.52    |
| NEU [%]       | 0.20        | 0.43    | 0.27        | 0.28    | 0.13    | 0.61    |
| LIMF [G/L]    | 0.07        | 0.78    | -0.14       | 0.59    | 0.07    | 0.79    |
| LIMF [%]      | -0.24       | 0.33    | -0.25       | 0.31    | -0.19   | 0.44    |
| MONO [G/L]    | 0.36        | 0.14    | -0.01       | 0.96    | 0.38    | 0.12    |
| MONO [%]      | 0.19        | 0.45    | -0.15       | 0.55    | 0.26    | 0.29    |
| EOS [G/L]     | -0.02       | 0.95    | 0.11        | 0.65    | -0.01   | 0.99    |
| EOS [%]       | -0.11       | 0.95    | -0.01       | 0.98    | -0.08   | 0.75    |
| BAS [G/L]     | 0.08        | 0.66    | -0.01       | 0.97    | 0.17    | 0.50    |
| BAS [%]       | -0.18       | 0.74    | -0.12       | 0.64    | -0.06   | 0.83    |
| PLT [G/L]     | -0.10       | 0.71    | 0.15        | 0.56    | -0.05   | 0.83    |
| PDW [fL]      | 0.37        | 0.14    | 0.17        | 0.51    | 0.34    | 0.17    |
| PCT [%]       | 0.02        | 0.93    | 0.19        | 0.44    | 0.06    | 0.82    |
| Large PLT [%] | 0.39        | 0.11    | 0.17        | 0.49    | 0.37    | 0.13    |
| NLR           | 0.21        | 0.41    | 0.29        | 0.25    | 0.16    | 0.53    |
| LMR           | -0.32       | 0.20    | -0.13       | 0.60    | -0.35   | 0.15    |
| LCR           | 0.13        | 0.60    | -0.01       | 0.87    | -0.20   | 0.43    |
| PLR           | -0.01       | 0.97    | 0.21        | 0.40    | 0.02    | 0.93    |

Table S4. Correlations of red blood cell adenine nucleotide ratios and adenylate energy charge (AEC) with peripheral blood cell count in long COVID19 participants. Results are shown as Pearson correlation coefficient (r) and p value (p).

| Parameter | ADP          |         | AMP          |         | TAN          |         |
|-----------|--------------|---------|--------------|---------|--------------|---------|
|           | [μmol/L RBC] |         | [μmol/L RBC] |         | [μmol/L RBC] |         |
|           | r            | p value | r            | p value | r            | p value |
| NLR       | 0.08         | 0.75    | -0.05        | 0.85    | 0.65         | <0.01   |
| LMR       | 0.30         | 0.22    | 0.35         | 0.16    | -0.13        | 0.60    |
| LCR       | -0.37        | 0.13    | -0.34        | 0.17    | -0.48        | <0.05   |
| PLR       | 0.13         | 0.59    | 0.05         | 0.84    | 0.42         | 0.08    |

Table S5. Correlations of red blood cell adenosine diphosphate (ADP), adenosine monophosphate (AMP), and total adenine nucleotide (TAN) concentration with peripheral blood cell count in long COVID19 participants. Results are shown as Pearson correlation coefficient (r) and p value (p).
